# Supplementary material
Source: publisher site journal article supplement (https://www.dovepress.com/article/363079)
Supplement: Supplementary file 1 [file get_supplementary_file.php]

**Supplementary Material**

**The complete form of the questionnaire used for data collection**

**Section 1: Demographic data**
1. Gender:
Male ( ) Female ( )
2. Work experience:
<5 yrs. ( ) 5-10 yrs. ( ) >10 yrs. ( )
3. Qualification:
B. Pharm ( ) M. Pharm ( ) PHD ( )

| **(knowledge) Statements** | **Yes** | **No** | **Unsure** |
| --- | --- | --- | --- |
| Antibiotics are indicated to relieve inflammations. |  |  |  |
| In most cases, antibiotics can be dispensed for prophylaxis of future infections. |  |  |  |
| Cross- resistance is the condition in which bacteria are able to resist particular type of antibiotic that often result in resistance to another type of antibiotic, usually from a similar chemical class |  |  |  |
| Resistant bacteria can’t be spread in healthcare institutions and communities |  |  |  |
| The occurrence of antibiotics resistance is mainly a problem in hospital settings |  |  |  |
| Inappropriate use of antibiotics increases the emergence of bacterial resistance to antibiotics |  |  |  |
| Pharmacist may advise the patients to stop taking antibiotics when their symptoms improve |  |  |  |

**Section two: Pharmacist knowledge regarding DAwP**

| **(Practice) Statement** | **Always** | **Sometimes** | **Never** |
| --- | --- | --- | --- |
| How often do you dispense antibiotics without prescription? |  |  |  |
| When dispensing antibiotics without prescription, I ask patients about medical and medication history |  |  |  |
| When patient request antibiotics when they do not need them, I explain for them why I think they do not need it |  |  |  |
| When dispensing antibiotics without prescription, I educate patients about the importance of adherence and completing the full course of antibiotics |  |  |  |
| I refer a patient to the doctor if I am not sure about their symptoms |  |  |  |
| How often do you receive feedback after dispensing antibiotics without prescription? |  |  |  |
| I dispense antibiotics without a prescription if a patient requests an antibiotic by name |  |  |  |
| I dispense antibiotics without prescription if I knew the symptoms. |  |  |  |

**Section three: pharmacist practice regarding DAwP:**

**Section four: pharmacist attitude regarding DAwP:**

| (Attitude) Statement | Strongly agree | Agree | Undecided | Disagree | Strongly disagree |
| --- | --- | --- | --- | --- | --- |
| I think antibiotics are overprescribed in Sudanese community |  |  |  |  |  |
| Prevention of dispensing antibiotic without medical prescription will decrease sales and profits of the pharmacy |  |  |  |  |  |
| Pharmacists have a responsibility to take an effective role in reducing antibiotic resistance |  |  |  |  |  |
| Once culture and sensitivity results are available, we should change empiric therapy to narrow- spectrum therapy |  |  |  |  |  |
| If you refuse to give antibiotics to a patient, as he does not require antibiotic, he/she can easily get them from another pharmacy |  |  |  |  |  |

**Section 5: Factors behind dispensing of antibiotics without prescription**

**What are the reasons make you dispense antibiotics without a prescription? (more than one option is allowed):**
1. Fear of losing customers ( ).
2. To increase pharmacy income ( ).
3. Pharmacy owner pressure ( ).
4. Patients pressure ( ).
5. Low socioeconomic status of patients ( ).
6. Patients trust and relationship ( ).
7. Pharmacists knowledgeable enough to give a patient antibiotic without a
prescription ( ).
8. Weak regulatory enforcement mechanisms ( ).

**Section 6: The common medical conditions for which the pharmacists dispense antibiotics without prescription**

**B. What type of conditions for which you dispense antibiotics without a prescription?
(more than one option is allowed):**
1. Acute sore throat ( ).
2. Common cold ( ).
3. Tonsillitis ( ).
4. Diarrhea ( ).
5. Urinary tract infections ( ).
6. Fever ( ).
7. Ear infections ( ).
8. Wound infections ( ).
